# Supplementary material
Source: PubMed Central journal article supplement (PMC8159015)

Table S1. Participant Identification Codes.

Table S1. Participant Identification Codes.

| Code Type                                                                     | Codes                                                               |
|-------------------------------------------------------------------------------|---------------------------------------------------------------------|
| International Classification of Diseases, Ninth Revision (ICD-9)              | 55.61, 55.69                                                        |
| International Statistical Classification of Diseases, Tenth Revision (ICD-10) | 0TY00Z0,<br>0TY00Z1,<br>0TY00Z2,<br>0TY10Z0,<br>0TY10Z1,<br>0TY10Z2 |
| Current Procedural Terminology (CPT)                                          | 50360, 50365,<br>50380, S2065                                       |

Table S2. Summary of studies that have used HOUSES.

Supplementary Table 2. Summary of studies that have used HOUSES

| Author                                                                                                                                                                                                                                                                                        | Population                                                               | Exposure | Outcomes                                                                                             | Effect sizes (95% CI)                                                                                                                                                                   |
|-----------------------------------------------------------------------------------------------------------------------------------------------------------------------------------------------------------------------------------------------------------------------------------------------|--------------------------------------------------------------------------|----------|------------------------------------------------------------------------------------------------------|-----------------------------------------------------------------------------------------------------------------------------------------------------------------------------------------|
| <b>Adults</b>                                                                                                                                                                                                                                                                                 |                                                                          |          |                                                                                                      |                                                                                                                                                                                         |
| <b>Chronic conditions</b>                                                                                                                                                                                                                                                                     |                                                                          |          |                                                                                                      |                                                                                                                                                                                         |
| Bang D, Manemann S, Gerber Y, et al. A Novel Socioeconomic Measure Using Individual Housing Data in Cardiovascular Outcome Research. <i>International Journal of Environmental Research and Public Health</i> . 2014;11(11):11597-11615.                                                      | Population-based 696 cases with MI and 718 controls without RA           | HOUSES   | Post-MI mortality                                                                                    | HR = 1.45 (0.82-2.58)*                                                                                                                                                                  |
| Ghawi H, Crowson CS, Rand-Weaver J, Krusemark E, Gabriel SE, Juhn YJ. A novel measure of socioeconomic status using individual housing data to assess the association of SES with rheumatoid arthritis and its mortality: a population-based case-control study. <i>BMJ Open</i> . 2015;5(4). | Population-based 650 cases with RA and 650 controls without RA           | HOUSES   | RA diagnosis and post-RA mortality                                                                   | OR = 1.06 (1.02-1.09)* (RA diagnosis)<br>HR = 1.58 (1.05-2.36)* (Post mortality)                                                                                                        |
| Takahashi PY, Ryu E, Hathcock MA, et al. A novel housing-based socioeconomic measure predicts hospitalisation and multiple chronic conditions in a community population. <i>Journal of Epidemiology and Community Health</i> . 2015;70(3):286-291.                                            | Biobank enrollees (n=6402)                                               | HOUSES   | All-cause hospitalization and multiple chronic conditions (MCC)                                      | HR = 1.53 (1.18-1.98)* (Hospitalization)<br>OR = 2.4 (2.0-3.1)* (MCC)                                                                                                                   |
| Wi C-I, Sauver JLS, Jacobson DJ, et al. Ethnicity, Socioeconomic Status, and Health Disparities in a Mixed Rural-Urban US Community—Olmsted County, Minnesota. <i>Mayo Clinic Proceedings</i> . 2016;91(5):612-622.                                                                           | Population-based community residents (n= 88 010)                         | HOUSES   | Prevalence of five common chronic conditions                                                         | OR = 0.74 (0.69, 0.80) (CHD)<br>OR = 0.78 (0.73, 0.83) (Asthma)<br>OR = 0.56 (0.52, 0.60) (Diabetes)<br>OR = 0.64 (0.61, 0.68) (Hypertension)<br>OR = 0.61 (0.58, 0.63) (Mood disorder) |
| Thacher TD, Dudenkov DV, Mara KC, Maxson JA, Wi C-I, Juhn YJ. The relationship of 25-hydroxyvitamin D concentrations and individual-level socioeconomic status. <i>The Journal of Steroid Biochemistry and Molecular Biology</i> . 2019:105545.                                               | Population-based community residents who had 25(OH)D results (n= 11 002) | HOUSES   | 25(OH)D concentration                                                                                | 25(OH)D increased by 0.28 (0.21-0.35; P < 0.001) ng/mL for each unit increase in HOUSES                                                                                                 |
| Bjur KA, Wi C-I, Ryu E, Crow SS, King KS, Juhn YJ. Epidemiology of Children With Multiple Complex Chronic Conditions in a Mixed Urban-Rural US Community. <i>Hospital Pediatrics</i> . 2019;9(4):281-290.                                                                                     | Population-based community residents                                     | HOUSES   | Five-year prevalence and incidence rates of children with Multiple Complex Chronic Conditions (MCCs) | MCCs tend to be more prevalent among children with a lower SES                                                                                                                          |
| <b>Acute conditions</b>                                                                                                                                                                                                                                                                       |                                                                          |          |                                                                                                      |                                                                                                                                                                                         |

|                                                                                                                                                                                                                                                |                                                                                               |                 |                                                                   |                                                                                                                                                                                                                                          |
|------------------------------------------------------------------------------------------------------------------------------------------------------------------------------------------------------------------------------------------------|-----------------------------------------------------------------------------------------------|-----------------|-------------------------------------------------------------------|------------------------------------------------------------------------------------------------------------------------------------------------------------------------------------------------------------------------------------------|
| Ryu E, Juhn YJ, Wheeler PH, et al. Individual housing-based socioeconomic status predicts risk of accidental falls among adults. <i>Annals of Epidemiology</i> . 2017;27(7).                                                                   | Biobank enrollees of 12 286 adults                                                            | HOUSES          | Accidental falls                                                  | HR = 0.58 (0.44-0.76)                                                                                                                                                                                                                    |
| <b>Behavioral risk conditions</b>                                                                                                                                                                                                              |                                                                                               |                 |                                                                   |                                                                                                                                                                                                                                          |
| Wi C-I, Gauger J, Bachman M, et al. Role of individual-housing-based socioeconomic status measure in relation to smoking status among late adolescents with asthma. <i>Annals of Epidemiology</i> . 2016;26(7):455-460.                        | Population-based birth cohort with asthma aged 19-22 years (n=289)                            | HOUSES          | Smoking status                                                    | OR = 0.39 (0.18-0.87)                                                                                                                                                                                                                    |
| Ryu E, Olson JE, Juhn YJ, et al. Association between an individual housing-based socioeconomic index and inconsistent self-reporting of health conditions: a prospective cohort study in the Mayo Clinic Biobank. <i>BMJ Open</i> . 2018;8(5). | Biobank enrollees (n=11 717)                                                                  | HOUSES          | Inconsistency in survey results when reporting prevalent diseases | OR = 1.46 (1.17 - 1.84)*                                                                                                                                                                                                                 |
| Barwise A, Juhn YJ, Wi C-I, et al. An Individual Housing-Based Socioeconomic Status Measure Predicts Advance Care Planning and Nursing Home Utilization. <i>American Journal of Hospice and Palliative Medicine</i> ®. 2018;36(5):362-369.     | Population-based cohort admitted to intensive care units (ICUs)                               | HOUSES          | Advance directives<br>Discharge to home                           | OR = -0.77(0.63-0.93)<br>OR = -0.60 (1.0.5-0.72)                                                                                                                                                                                         |
| <b>Children</b>                                                                                                                                                                                                                                |                                                                                               |                 |                                                                   |                                                                                                                                                                                                                                          |
| <b>Chronic conditions</b>                                                                                                                                                                                                                      |                                                                                               |                 |                                                                   |                                                                                                                                                                                                                                          |
| Juhn YJ, Beebe TJ, Finnie DM, et al. Development and Initial Testing of a New Socioeconomic Status Measure Based on Housing Data. <i>Journal of Urban Health</i> . 2011;88(5):933-944.                                                         | Random sample of children living in Olmsted County, MN (n=750) and Jackson County, MO (n=781) | HOUSES          | Overweight, low birth weight, tobacco smoking status of household | 1. Olmsted County<br>OR = 0.39 (p=0.008) (Overweight)<br>OR = 0.63 (p=0.330) (LBW)<br>OR = 0.39 (p=0.007) (Smoking)<br>2. Jackson County<br>OR = 0.49 (p=0.07) (Overweight)<br>OR = 0.42 (p=0.018) (LBW)<br>OR = 0.24 (p<.001) (Smoking) |
| Butterfield MC, Williams AR, Beebe T, et al. A two-county comparison of the HOUSES index on predicting self-rated health. <i>Journal of Epidemiology &amp; Community Health</i> . 2010;65(3):254-259.                                          | Random sample of children living in Olmsted County, MN (n=746) and Jackson County, MO (n=704) | HOUSES          | Adverse self-rated health                                         | 1. Olmsted County; OR = 0.21 (0.08-0.51)<br>2. Jackson County; OR = 0.99 (0.25-4.04)                                                                                                                                                     |
| Harris MN, Lundien MC, Finnie DM, et al. Application of a novel socioeconomic measure using individual housing data in asthma research: an exploratory study. <i>npj Primary Care Respiratory Medicine</i> . 2014;24(1).                       | Random sample of children with asthma from Sanford Children Hospital (n=80)                   | HOUSES          | Poorly control asthma by Asthma Control Test score                | OR = 0.21 (0.05-0.89)                                                                                                                                                                                                                    |
| Ryu E, Wi C-I, Crow SS, et al. Assessing health disparities in children using a modified housing-related socioeconomic                                                                                                                         | Random sample of children living in                                                           | Modified HOUSES | Overweight, low birth weight, tobacco                             | 1. Olmsted County                                                                                                                                                                                                                        |

|                                                                       |                                                           |  |                             |                                                                                                                                                                                                                                   |
|-----------------------------------------------------------------------|-----------------------------------------------------------|--|-----------------------------|-----------------------------------------------------------------------------------------------------------------------------------------------------------------------------------------------------------------------------------|
| status measure: a cross-sectional study. <i>BMJ Open</i> . 2016;6(7). | Olmsted County, MN (n=750) and Jackson County, MO (n=781) |  | smoking status of household | OR = 0.48 (0.25-0.94) (Overweight)<br>OR = 0.78 (0.30-2.03) (LBW)<br>OR = 0.24 (0.11-0.49) (Smoking)<br>2. Jackson County<br>OR = 0.45 (0.23-0.89) (Overweight)<br>OR = 0.54 (0.34-1.21) (LBW)<br>OR = 0.26 (0.16-0.44) (Smoking) |
|-----------------------------------------------------------------------|-----------------------------------------------------------|--|-----------------------------|-----------------------------------------------------------------------------------------------------------------------------------------------------------------------------------------------------------------------------------|

**Acute Conditions**

|                                                                                                                                                                                                                                        |                                                   |        |                                                                           |                                                                                                                                                                                  |
|----------------------------------------------------------------------------------------------------------------------------------------------------------------------------------------------------------------------------------------|---------------------------------------------------|--------|---------------------------------------------------------------------------|----------------------------------------------------------------------------------------------------------------------------------------------------------------------------------|
| Johnson MD, Urm SH, Jung JA, et al. Housing data-based socioeconomic index and risk of invasive pneumococcal disease: an exploratory study. <i>Epidemiology and Infection</i> . 2012;141(4):880-887.                                   | Population-based cases (n=35) and controls (n=70) | HOUSES | Invasive pneumococcal disease                                             | OR = 0.16 (0.02–1.11)                                                                                                                                                            |
| Bjur KA, Wi C-I, Ryu E, et al. Socioeconomic Status, Race/Ethnicity, and Health Disparities in Children and Adolescents in a Mixed Rural-Urban Community—Olmsted County, Minnesota. <i>Mayo Clinic Proceedings</i> . 2019;94(1):44-53. | Population-based community residents (n= 31 523)  | HOUSES | Bronchiolitis, Pneumonia, UTI, Accident and adverse childhood experiences | OR = 0.69 (0.61-0.78) (Bronchiolitis)<br>OR = 0.88 (0.78,-0.99) (Pneumonia)<br>OR = 0.66 (0.56-0.78) (UTI)<br>OR = 0.54 (0.44-0.66) (Accident and adverse childhood experiences) |

**Behavioral risk conditions**

|                                                                                                                                                                                                                                             |                                                    |        |                                     |                        |
|---------------------------------------------------------------------------------------------------------------------------------------------------------------------------------------------------------------------------------------------|----------------------------------------------------|--------|-------------------------------------|------------------------|
| Hammer R, Capili C, Wi C-I, Ryu E, Rand-Weaver J, Juhn YJ. A new socioeconomic status measure for vaccine research in children using individual housing data: a population-based case-control study. <i>BMC Public Health</i> . 2016;16(1). | Population-based case (n=130) and controls (n=261) | HOUSES | Pertussis vaccine up-to-date status | OR = 3.66 (1.34-9.96)* |
|---------------------------------------------------------------------------------------------------------------------------------------------------------------------------------------------------------------------------------------------|----------------------------------------------------|--------|-------------------------------------|------------------------|

*Note.* \*Highest SES (i.e., highest HOUSES) as a reference. Otherwise, the lowest HOUSES was used as a reference; HR = Hazard Ratio; OR = Odds Ratio; MI = Myocardial Infarction; RA = Rheumatoid Arthritis; Urinary Tract Infection = UTI

Figure S1. Kaplan Meier Estimates Comparing Graft Failure Rates Between Highest HOUSES Quartiles (Q2, Q3, Q4) Versus Lowest HOUSES Quartile (Q1) in all Recipients (N=181;  $P = 0.12$ ).

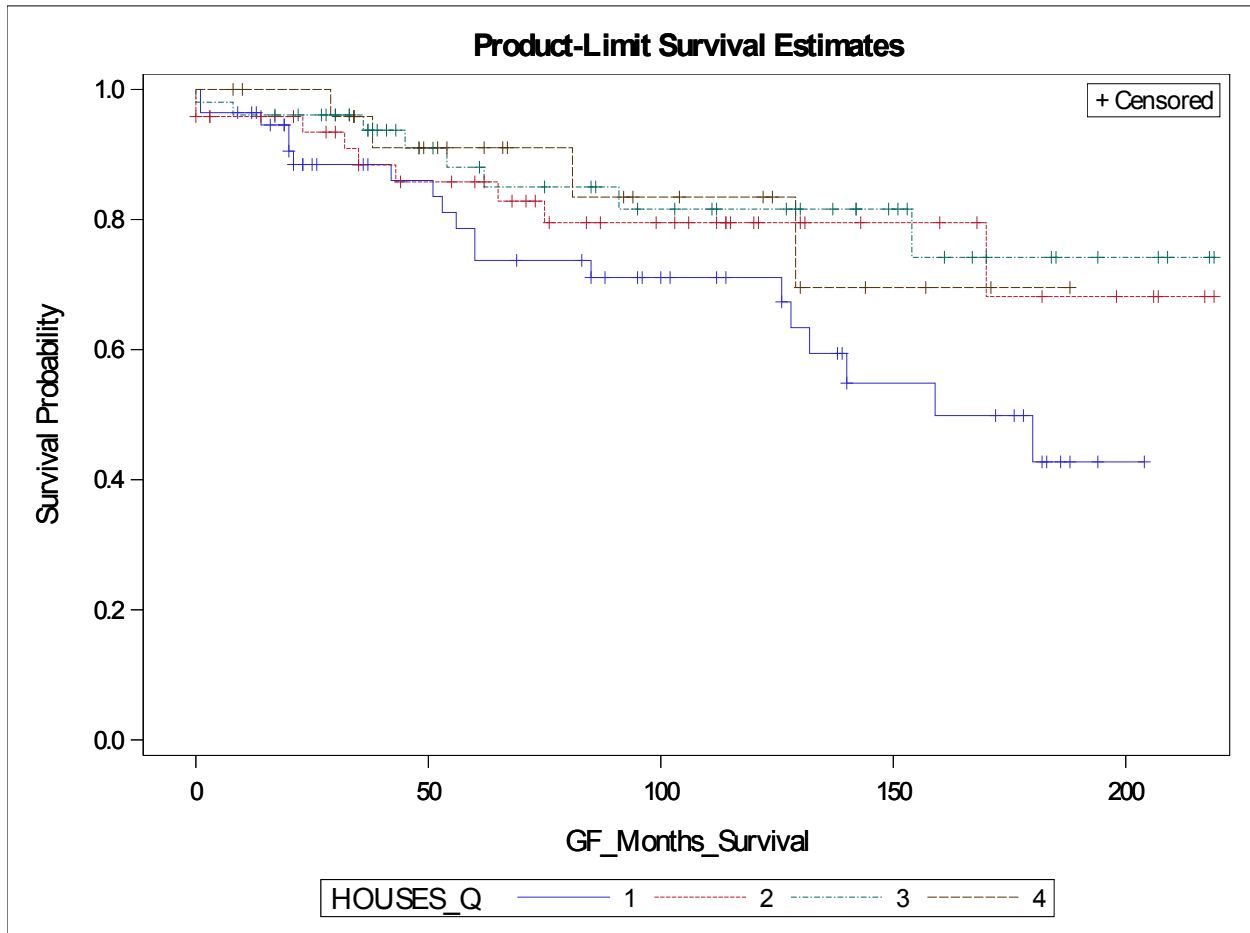

Figure S2. Kaplan Meier Estimates Comparing Graft Failure Rates Between Highest HOUSES Quartiles (Q2, Q3, Q4) Versus Lowest HOUSES Quartile (Q1) in DDKT Recipients (N=68; P = 0.09).

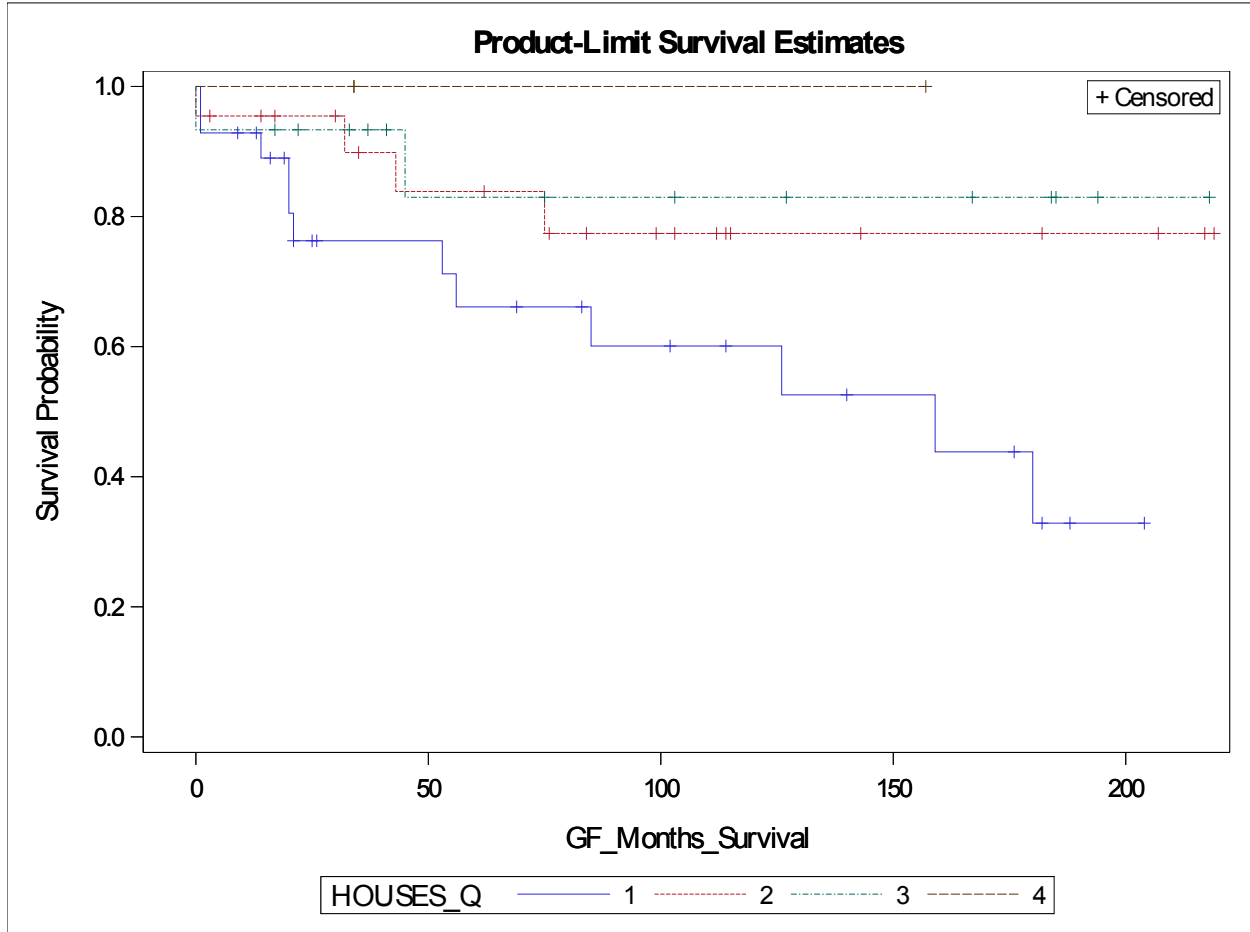

Figure S3. Kaplan Meier Estimates Comparing Graft Failure Rates Between Highest HOUSES Quartiles (Q2, Q3, Q4) Versus Lowest HOUSES Quartile (Q1) in LDKT Recipients (N=113;  $P = 0.92$ ).

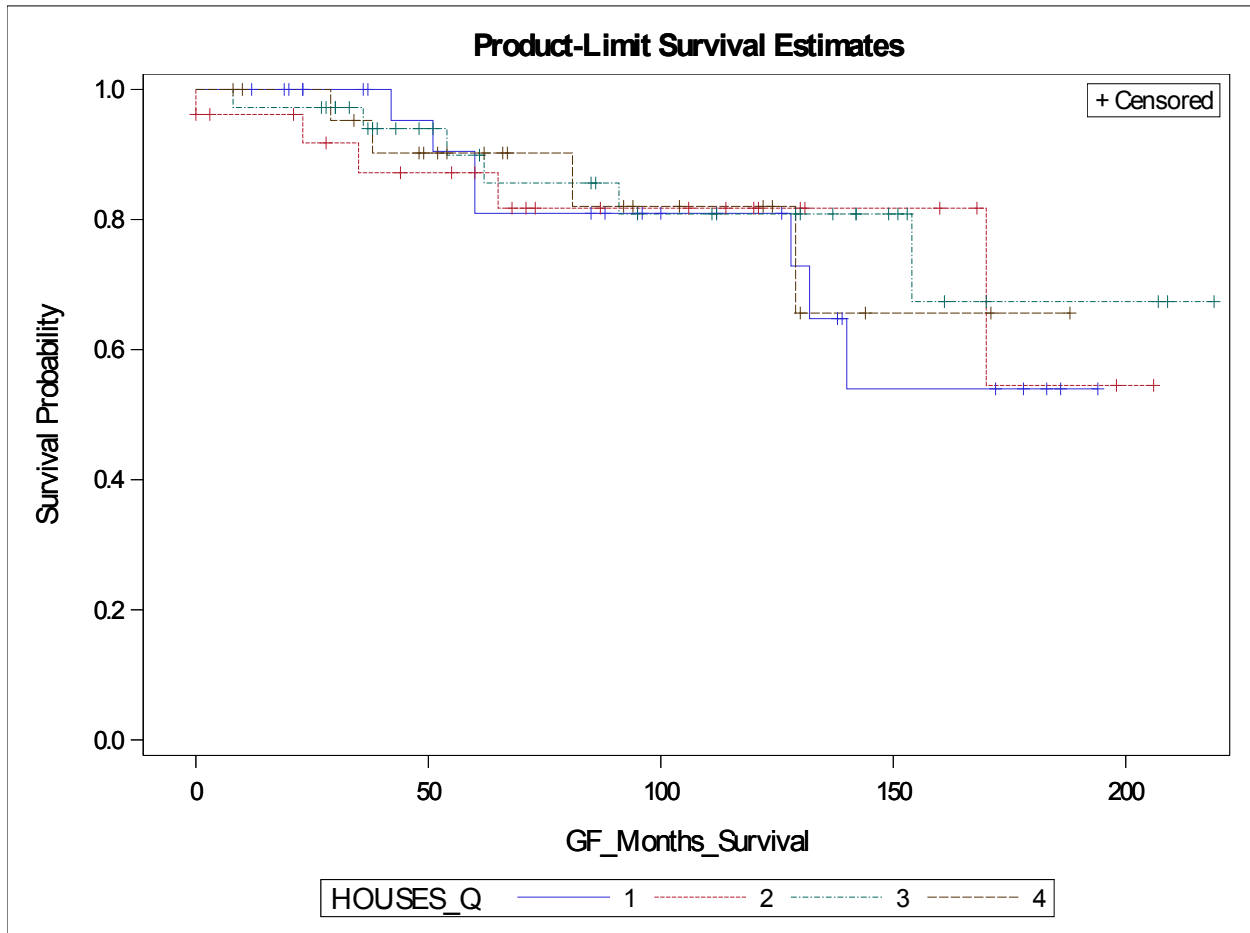

Supplement: NIHMS1678899-supplement-SDC.pdf [file NIHMS1678899-supplement-SDC.pdf]
